# Supplementary material
Source: MDPI journal article supplement (https://www.mdpi.com/search?q=biomolecules-09-00643)

## Supplementary Material

### **Evaluation of Novel Chalcone-Thiosemicarbazones Derivatives as Potential Anti-*Leishmania amazonensis* Agents and its HSA binding studies**

Edinéia Pastro Mendes <sup>1,2</sup>, Carla Marins Goulart <sup>1</sup>, Otávio Augusto Chaves <sup>1,3</sup>, Viviane dos S. Faiões <sup>4</sup>, Marilene M. Canto-Carvalho <sup>4</sup>, Gerzia C. Machado <sup>4</sup>, Eduardo Caio Torres-Santos <sup>4,\*</sup>, and Aurea Echevarria <sup>1,\*</sup>

<sup>1</sup>Instituto de Química, Departamento de Química Orgânica, Universidade Federal Rural do Rio de Janeiro, 23.890-000 Seropédica-RJ, Brazil; edinea@bio.fiocruz.br (E.P.M.); cmarinsgoulart@gmail.com (C.M.G.)

<sup>2</sup>Programa de Pós-graduação em Ciência, Tecnologia e Inovação em Agropecuária, Universidade Federal Rural do Rio de Janeiro, Seropédica, 23890-000 Seropédica-RJ, Brazil;

<sup>3</sup>Instituto SENAI de Inovação em Química Verde, Rua Morais e Silva N°53, Bloco 09, 20271-030 Maracanã-RJ, Brazil; oachaves@firjan.com.br (O.A.C.)

<sup>4</sup>Laboratório de Bioquímica de Tripanosomatídeos, Instituto Oswaldo Cruz, FIOCRUZ, 21040-900 Rio de Janeiro-RJ, Brazil; faioes@gmail.com (V.S.F.); mcantoca@ioc.fiocruz.br (M.M.C.-C.); machado@ioc.fiocruz.br (G.C.M.); ects@ioc.fiocruz.br (E.C.T.-S.)

\*Corresponding authors:

E-mail: [echevarr@ufrj.br](mailto:echevarr@ufrj.br) Tel/fax: (55) 21 2682-1172 (A. Echevarria)

E-mail: [ects@ioc.fiocruz.br](mailto:ects@ioc.fiocruz.br) Tel/fax: (55) 21 3865-8247 (E.C. Torres-Santos)

## Some Representative Spectra

Figure S1. IR spectrum of 1,3-diphenylprop-2-en-1-one thiosemicarbazone (5a)

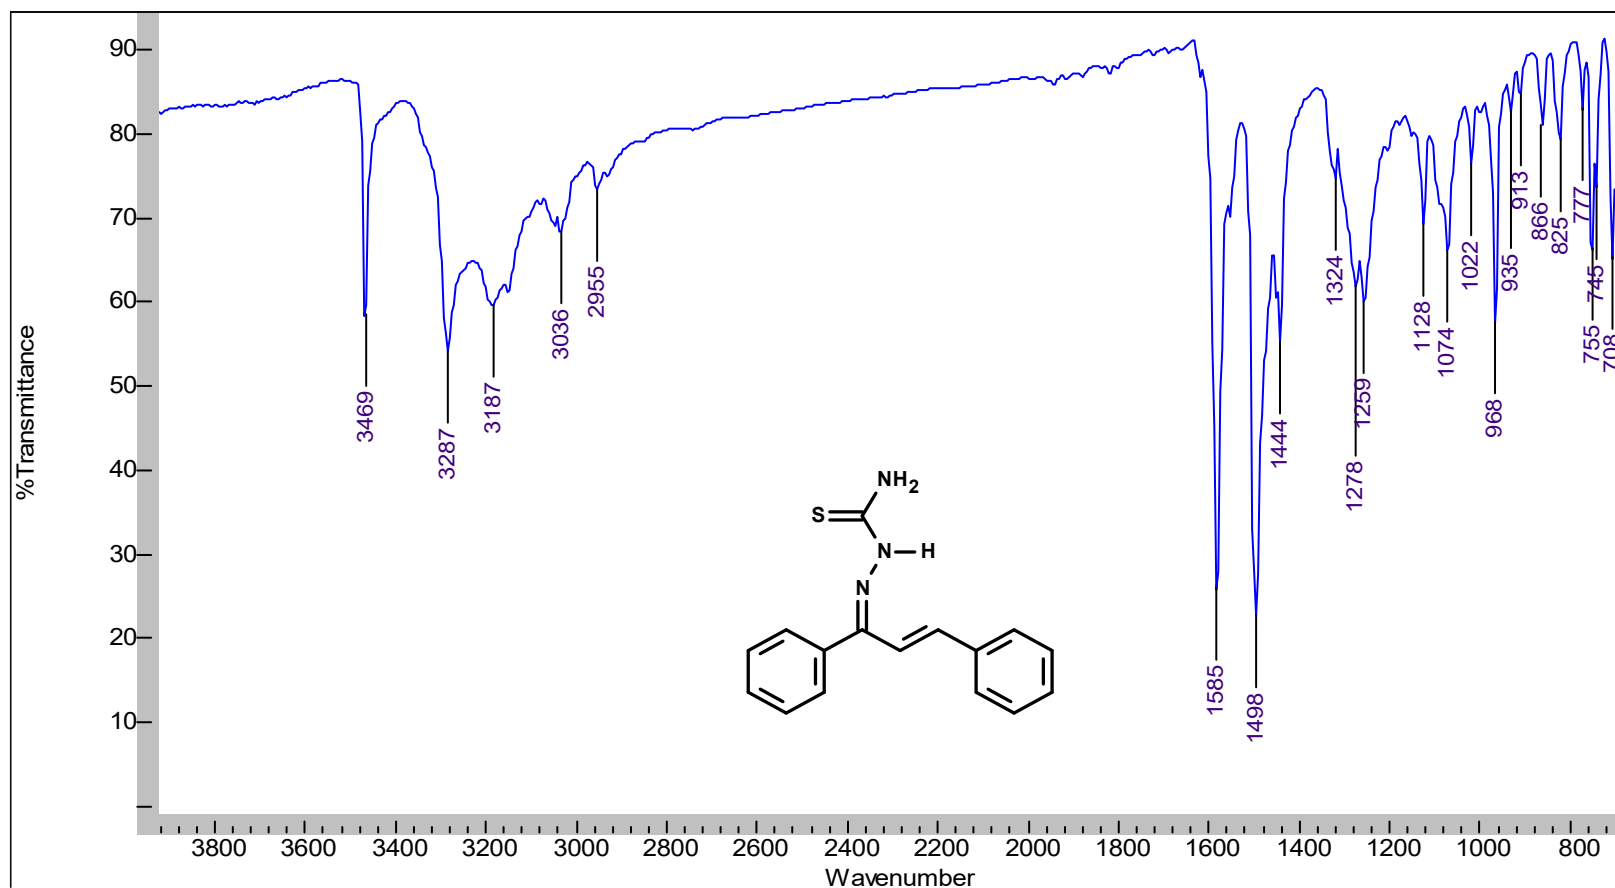

**Figure 2.**  $^1\text{H}$  NMR spectrum of 1,3-diphenylprop-2-en-1-ona thiosemicarbazone (**5a**).

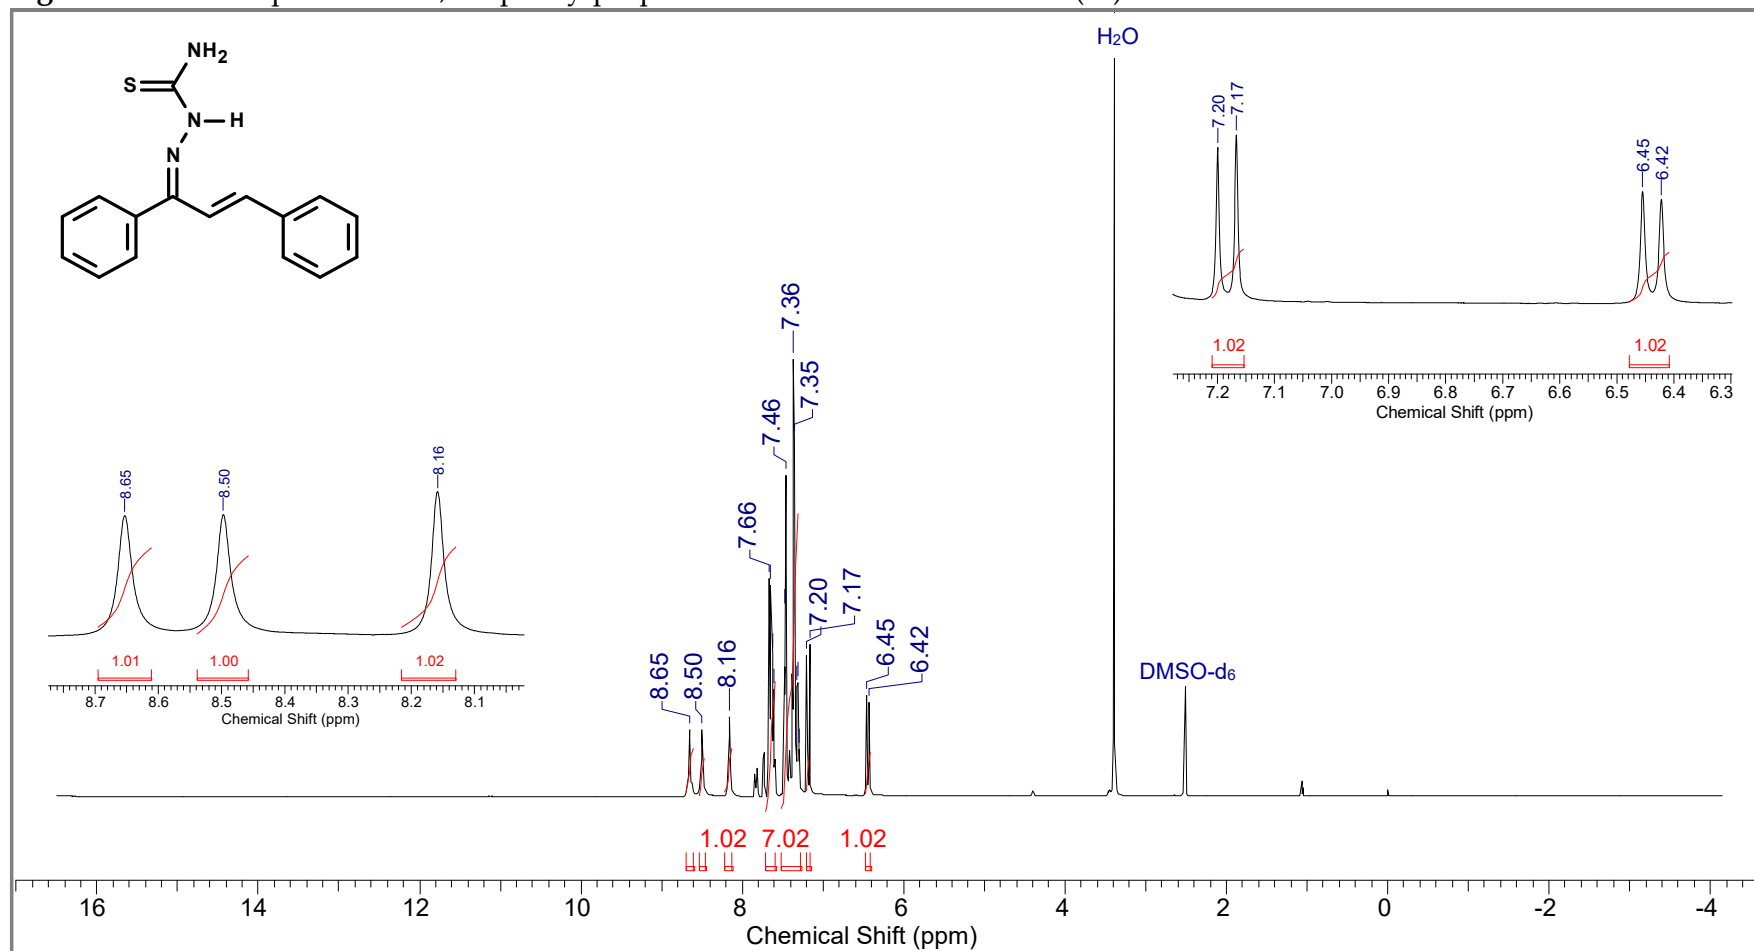

Figure S3.  $^{13}\text{C}$  NMR spectrum of 1,3-diphenylprop-2-en-1-one thiosemicarbazone (5a)

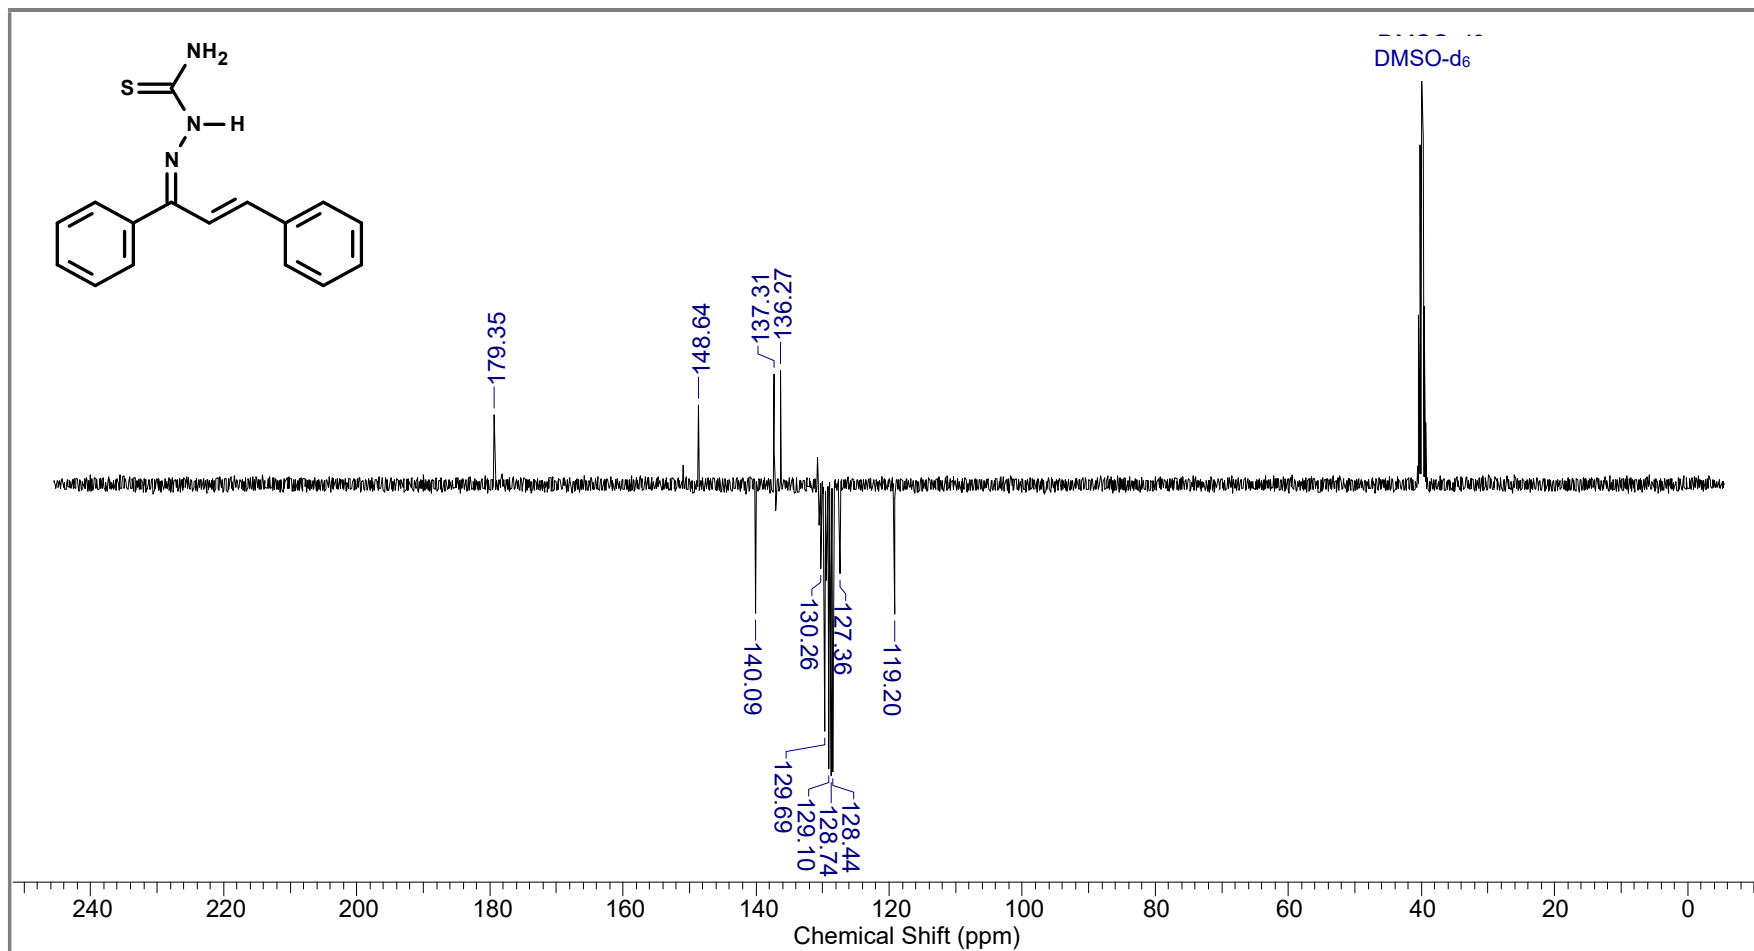

**Figure S4.** IR spectrum of 3-(4'-methylphenyl)-1-phenylprop-2-en-1-one thiosemicarbazone (**5b**)

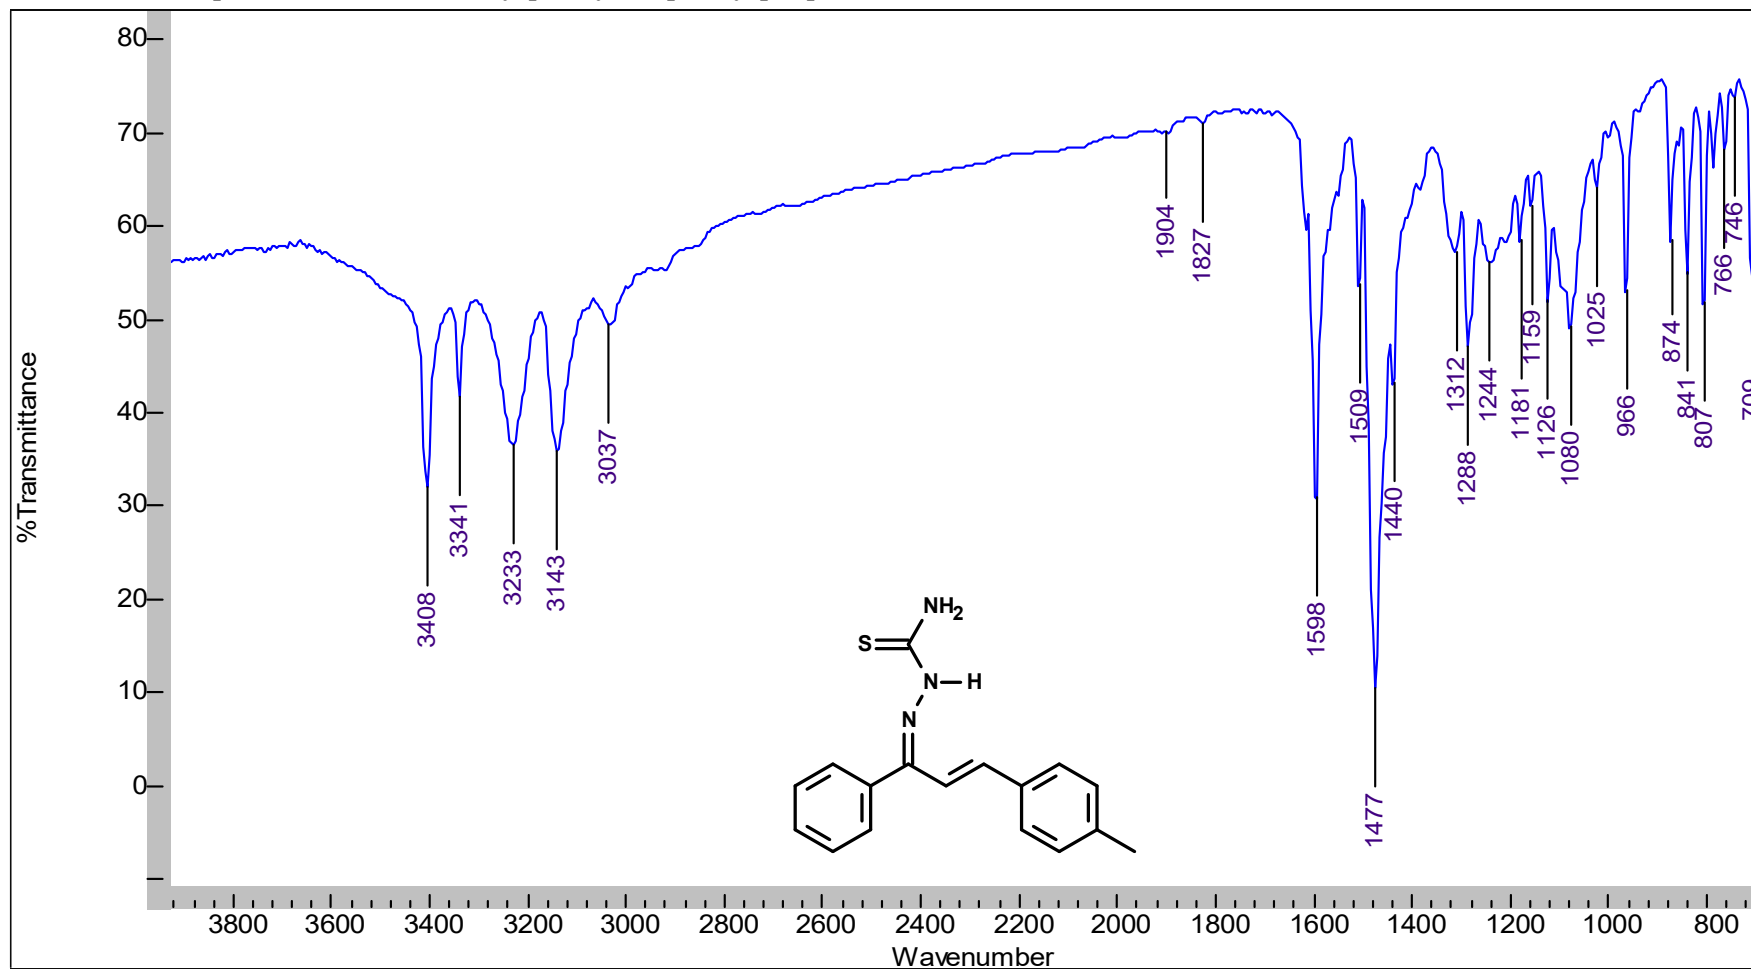

Figure S5. <sup>13</sup>C NMR-DEPTQ spectrum of 3-(4'-methylphenyl)-1-phenylprop-2-en-1-one thiosemicarbazone (**5b**)

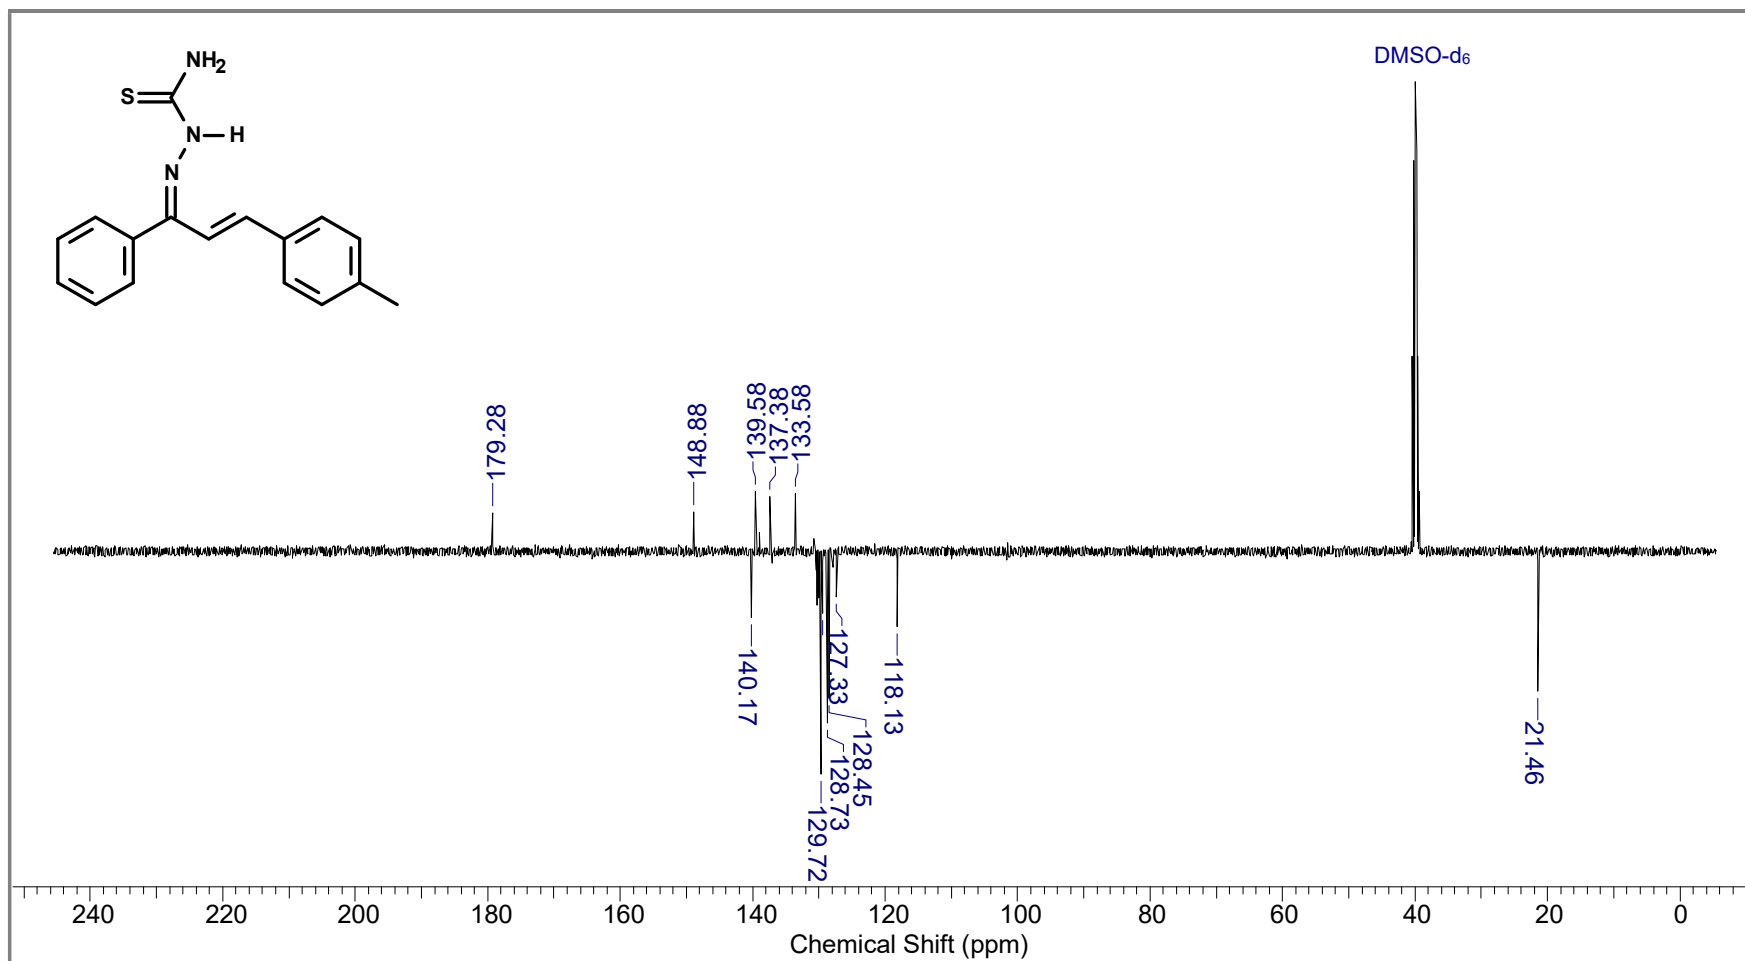

Figure S6. IR spectrum of 3-(4'-cyanophenyl)-1-phenylprop-2-en-1-one thiosemicarbazone (5c)

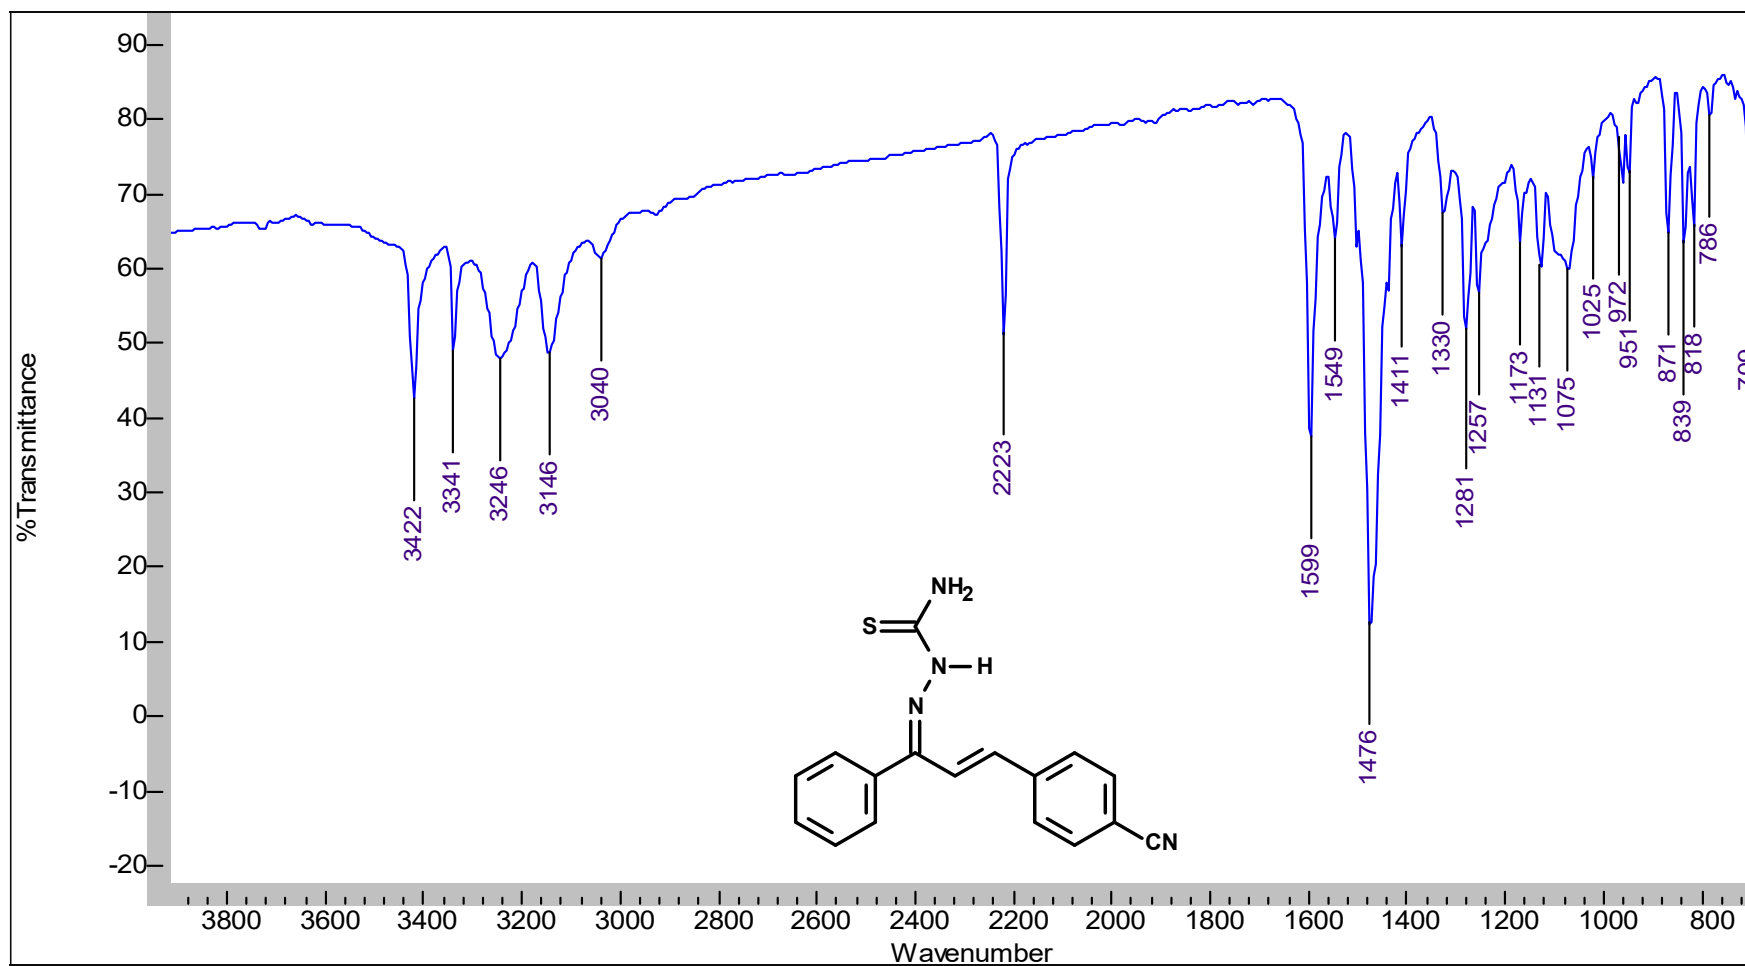

Figure S7. <sup>1</sup>H NMR spectrum of 3-(4'-cyanophenyl)-1-phenylprop-2-en-1-one thiosemicarbazone (**5c**)

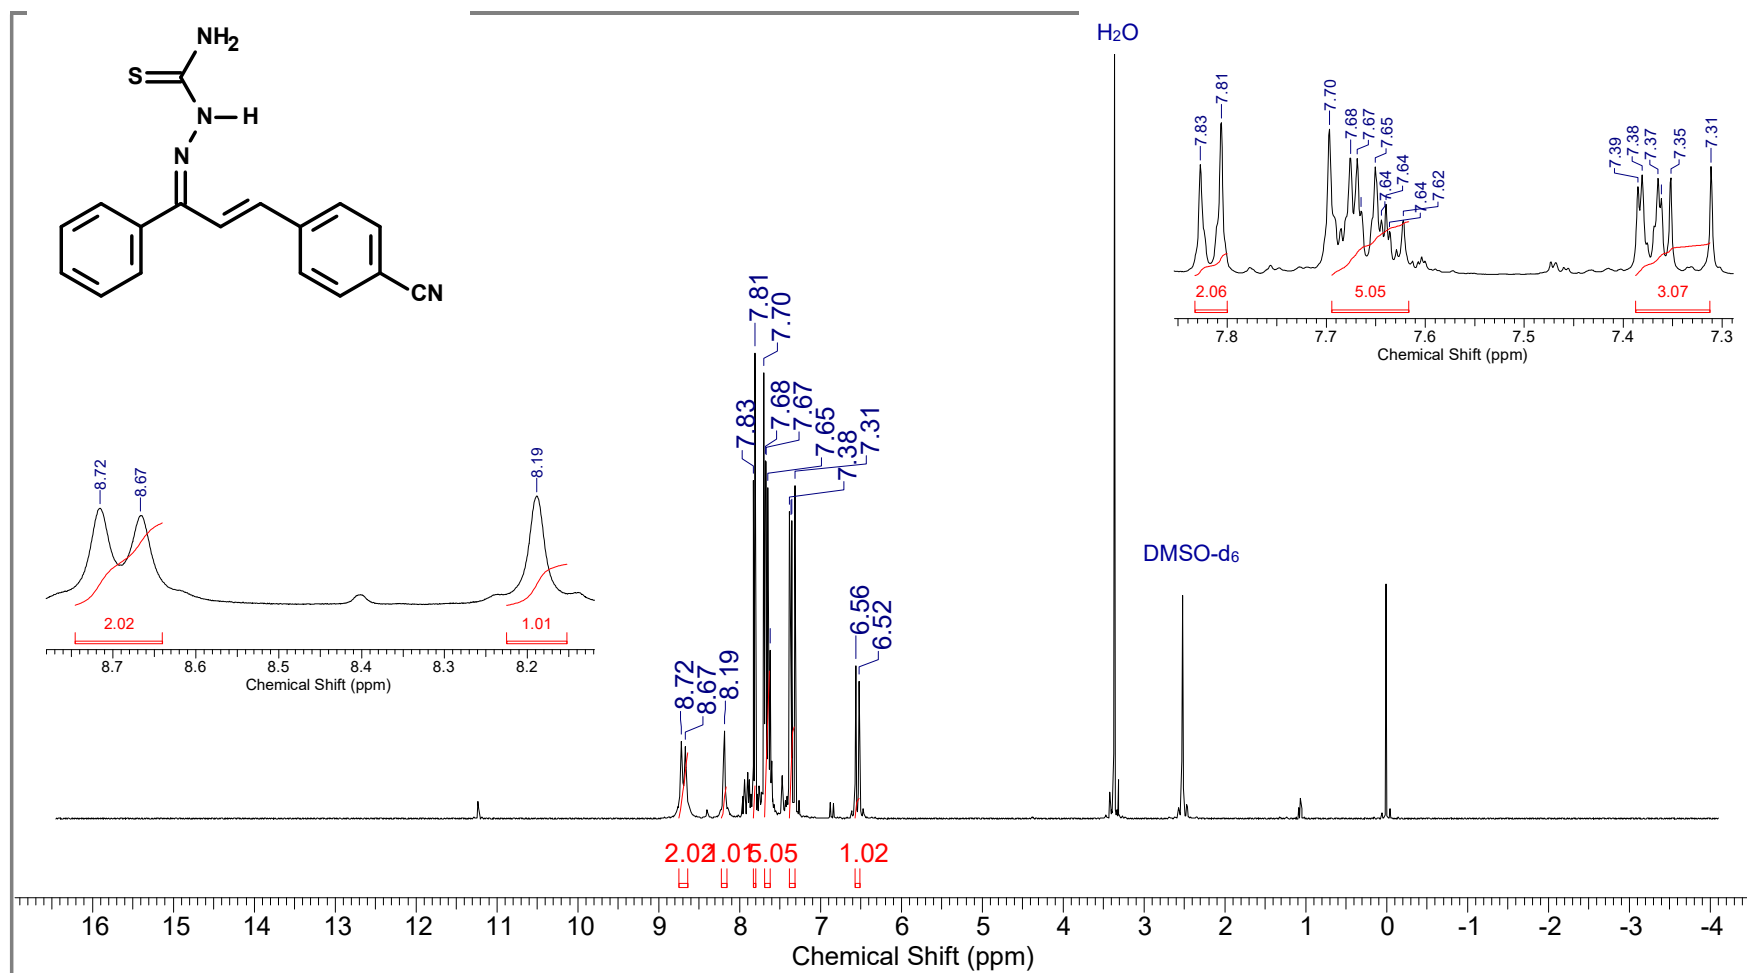



Figure S8.  $^{13}\text{C}$  NMR-DEPTQ spectrum of 3-(4'-cyanophenyl)-1-phenylprop-2-en-1-one thiosemicarbazone (**5c**)

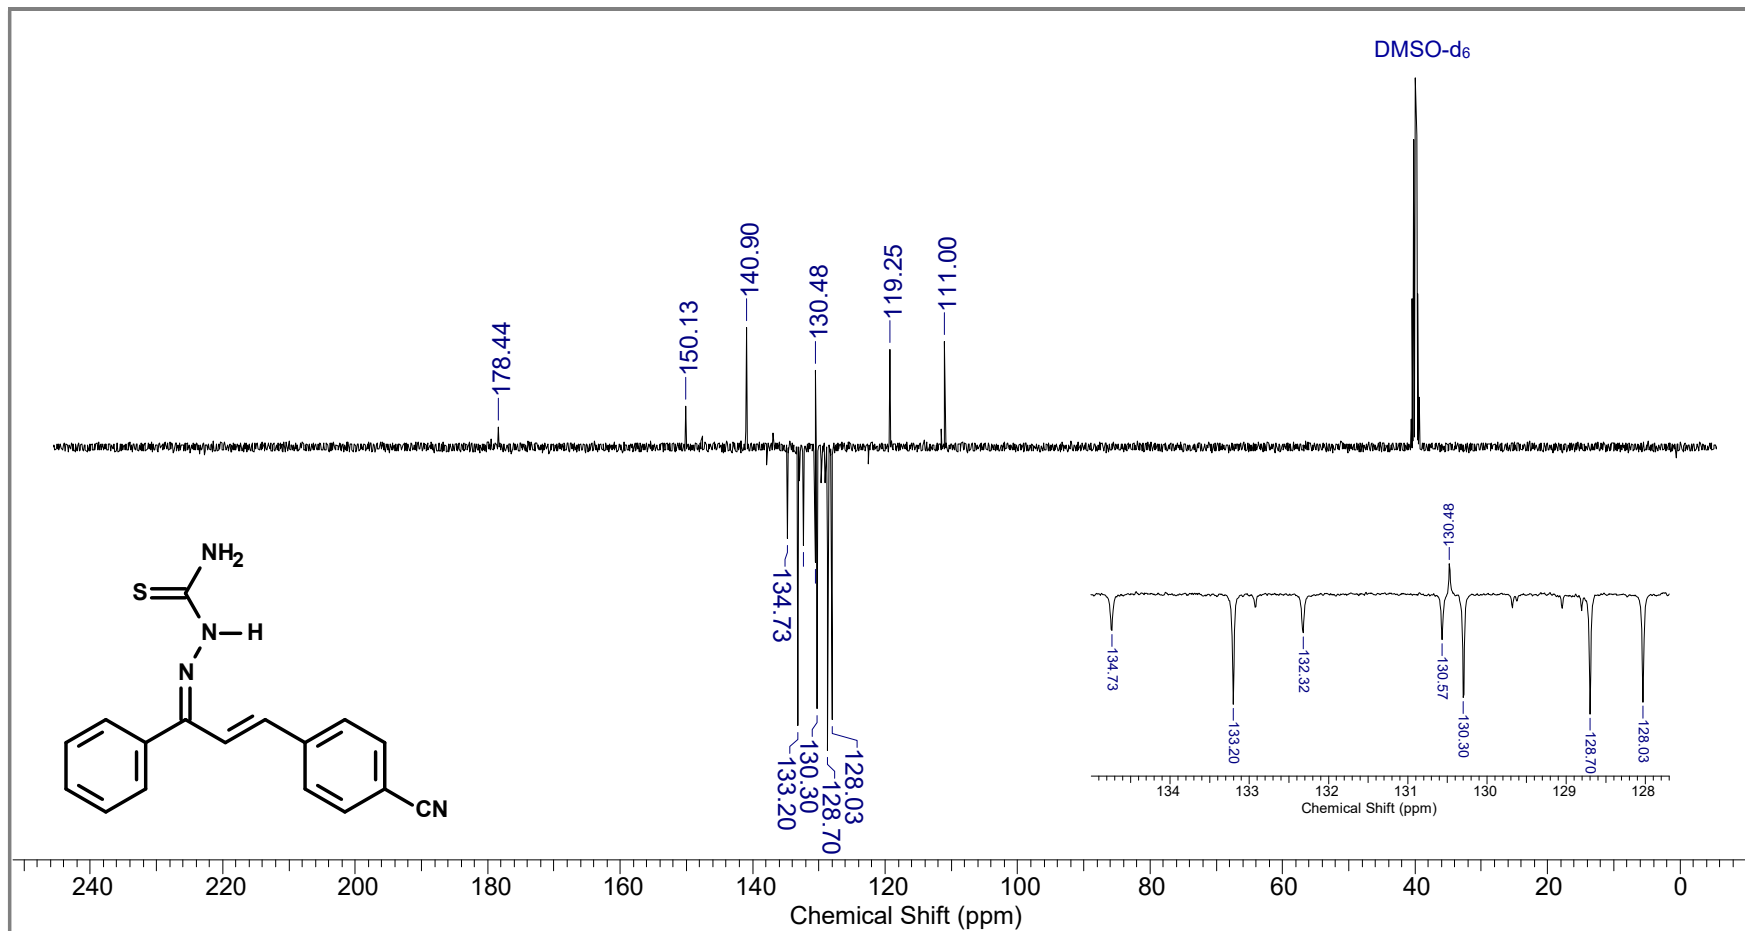

Figure S9. IR spectrum of 3-(4'-fluorophenyl)-1-phenylprop-2-en-1-one thiosemicarbazone (**5d**)

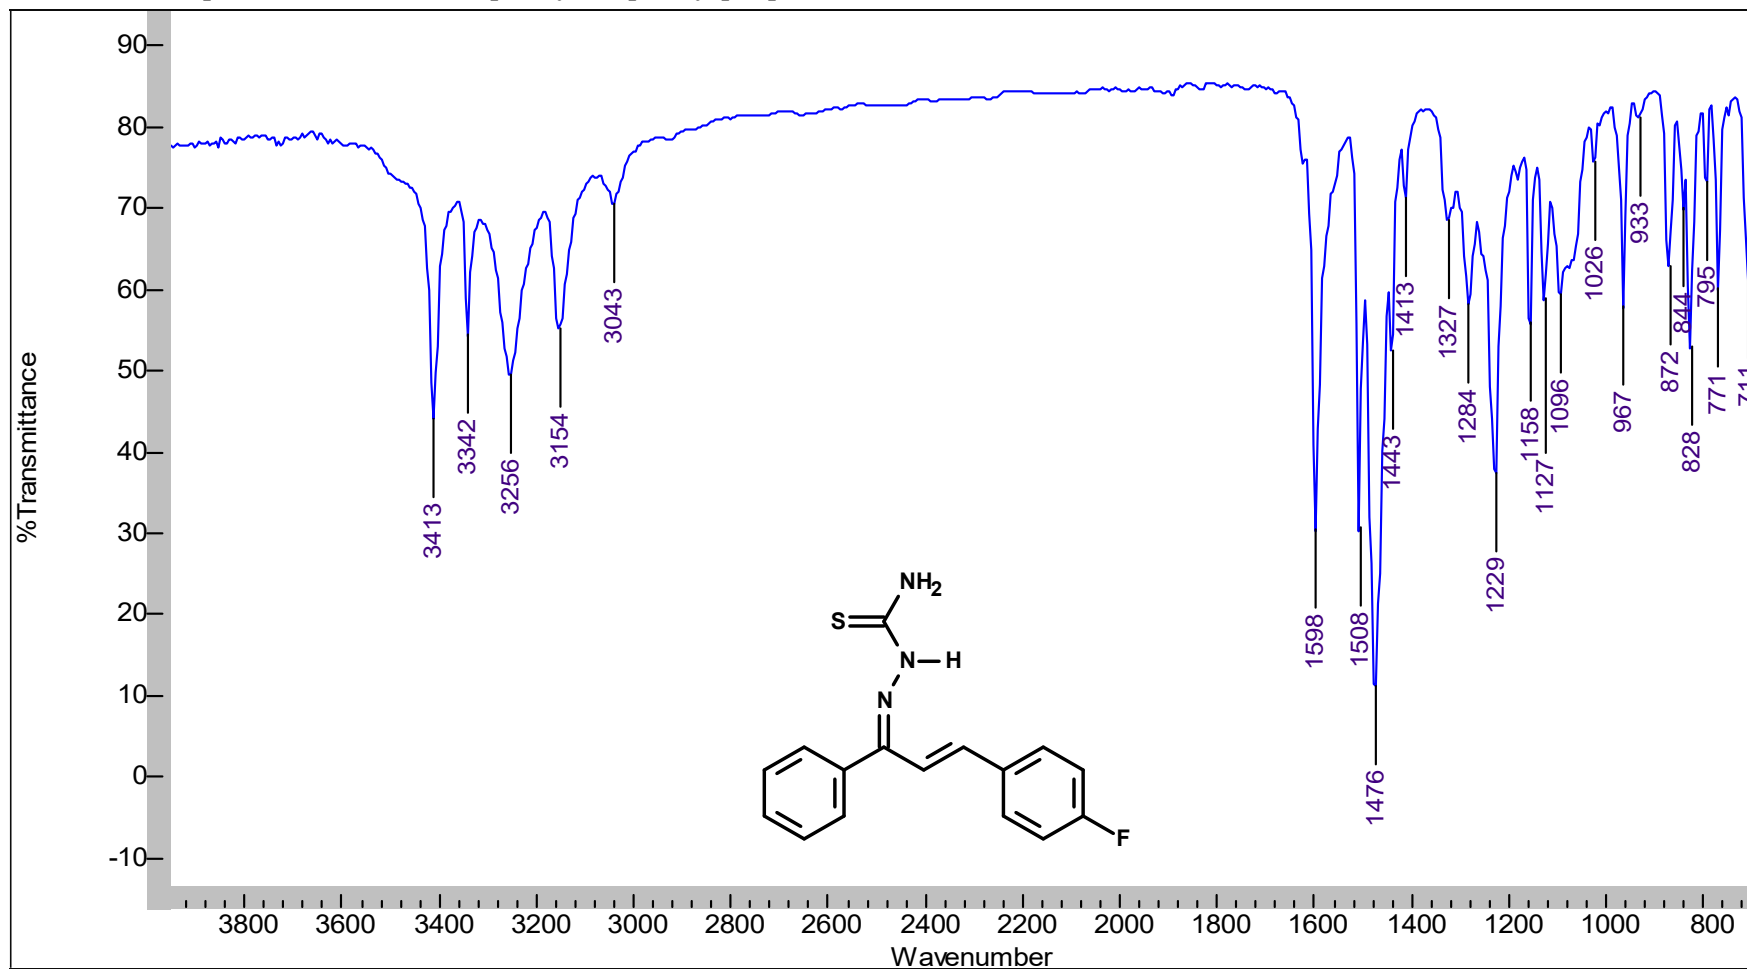

Figure S10. <sup>1</sup>H NMR spectrum of 3-(4'-fluorophenyl)-1-phenylprop-2-en-1-one thiosemicarbazone (**5d**)

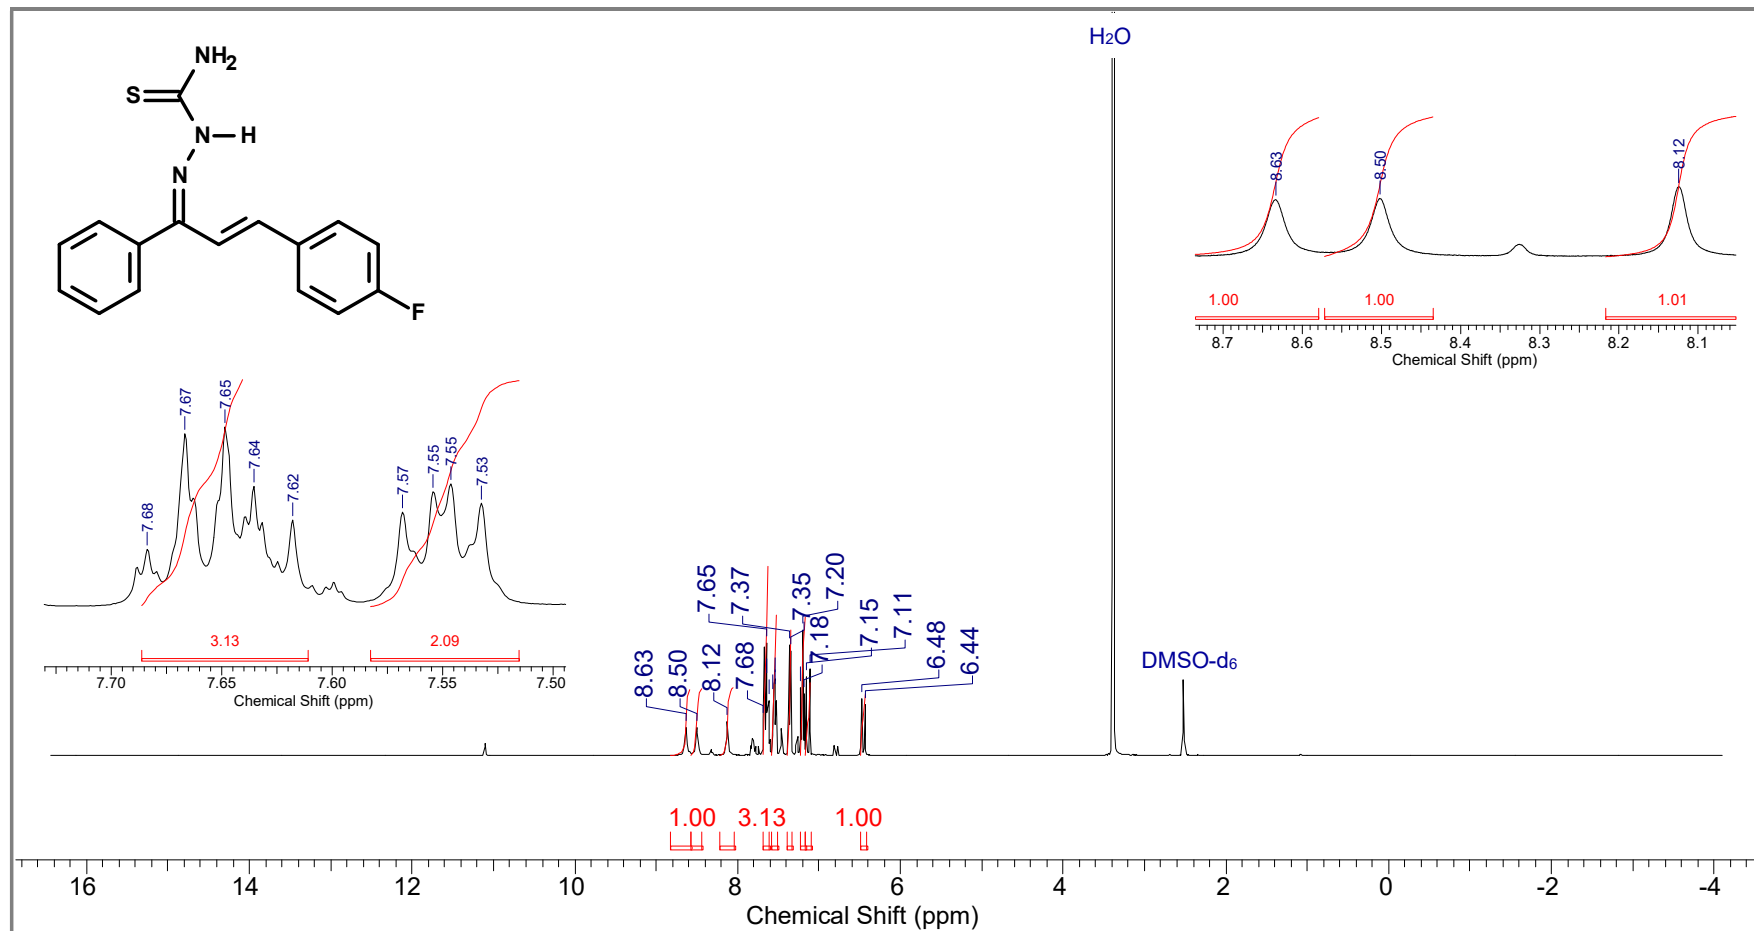

Figure S11.  $^{13}\text{C}$  NMR-DEPTQ spectrum of 3-(4'-fluorophenyl)-1-phenylprop-2-en-1-one thiosemicarbazone (**5d**)

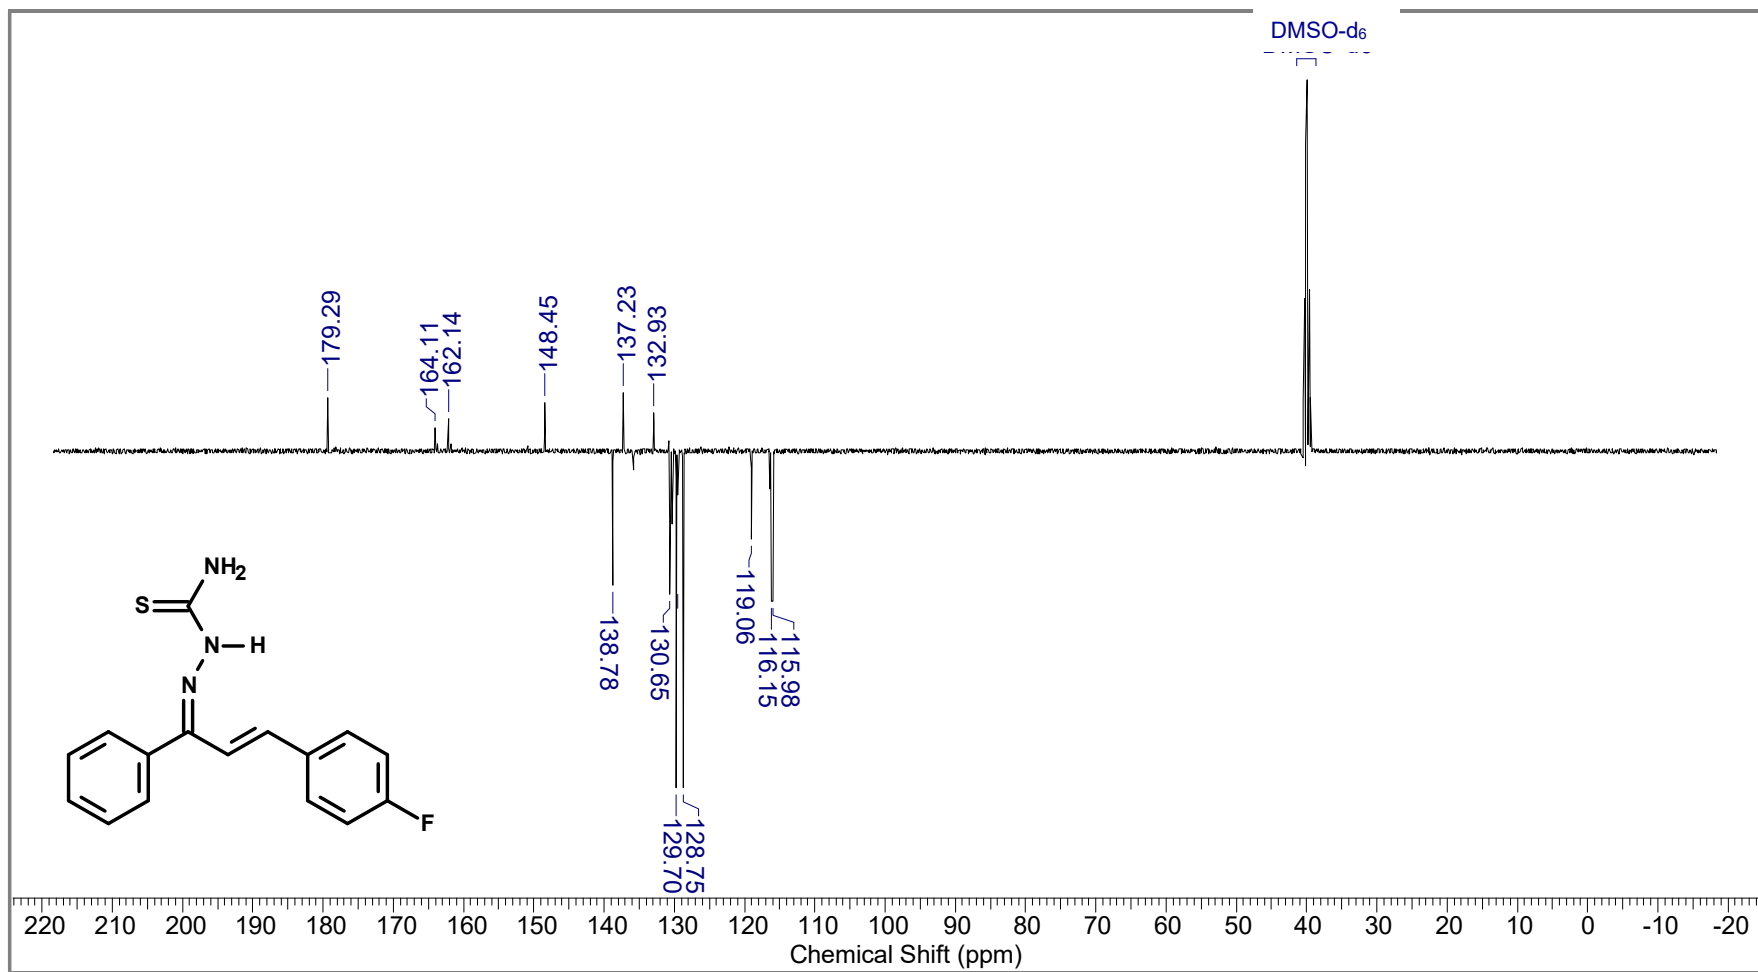

Figure S12. IR spectrum of 3-(4'-chlorophenyl)-1-phenylprop-2-en-1-one thiosemicarbazone (5e)

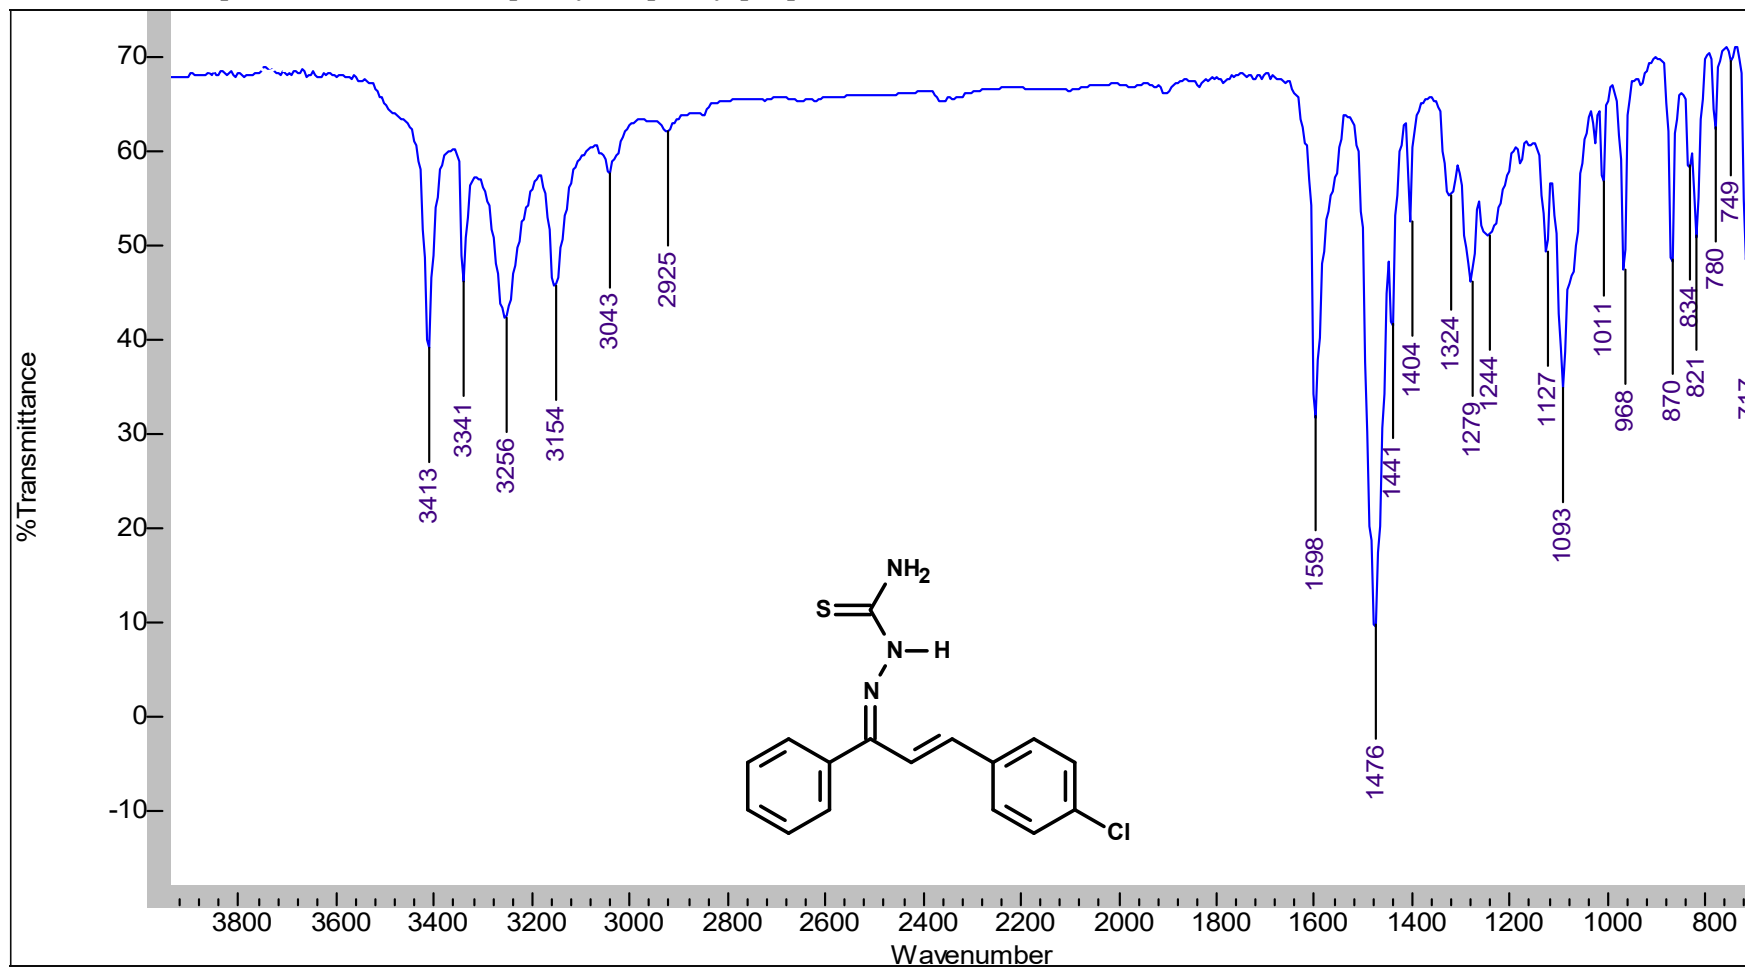

Figure S13. <sup>1</sup>H NMR spectrum of 3-(4'-chlorophenyl)-1-phenylprop-2-en-1-one thiosemicarbazone (5e)

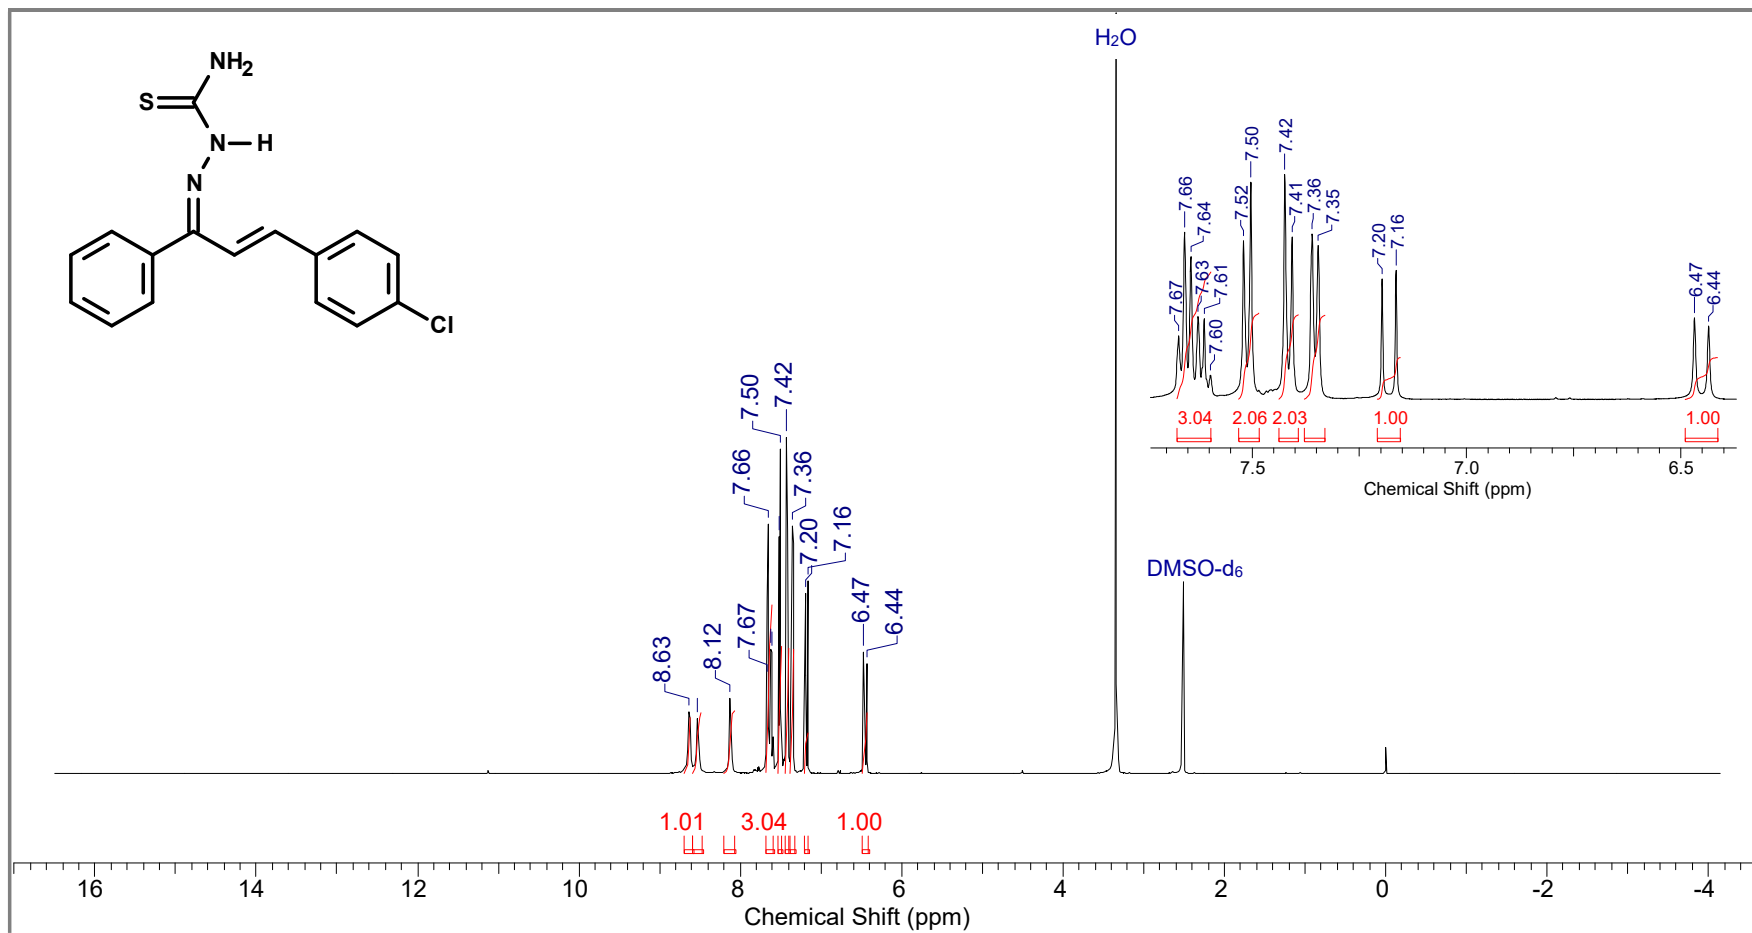

**Figure S14.**  $^{13}\text{C}$  NMR-DEPTQ spectrum of 3-(4'-chlorophenyl)-1-phenylprop-2-en-1-one thiosemicarbazone (**5e**)

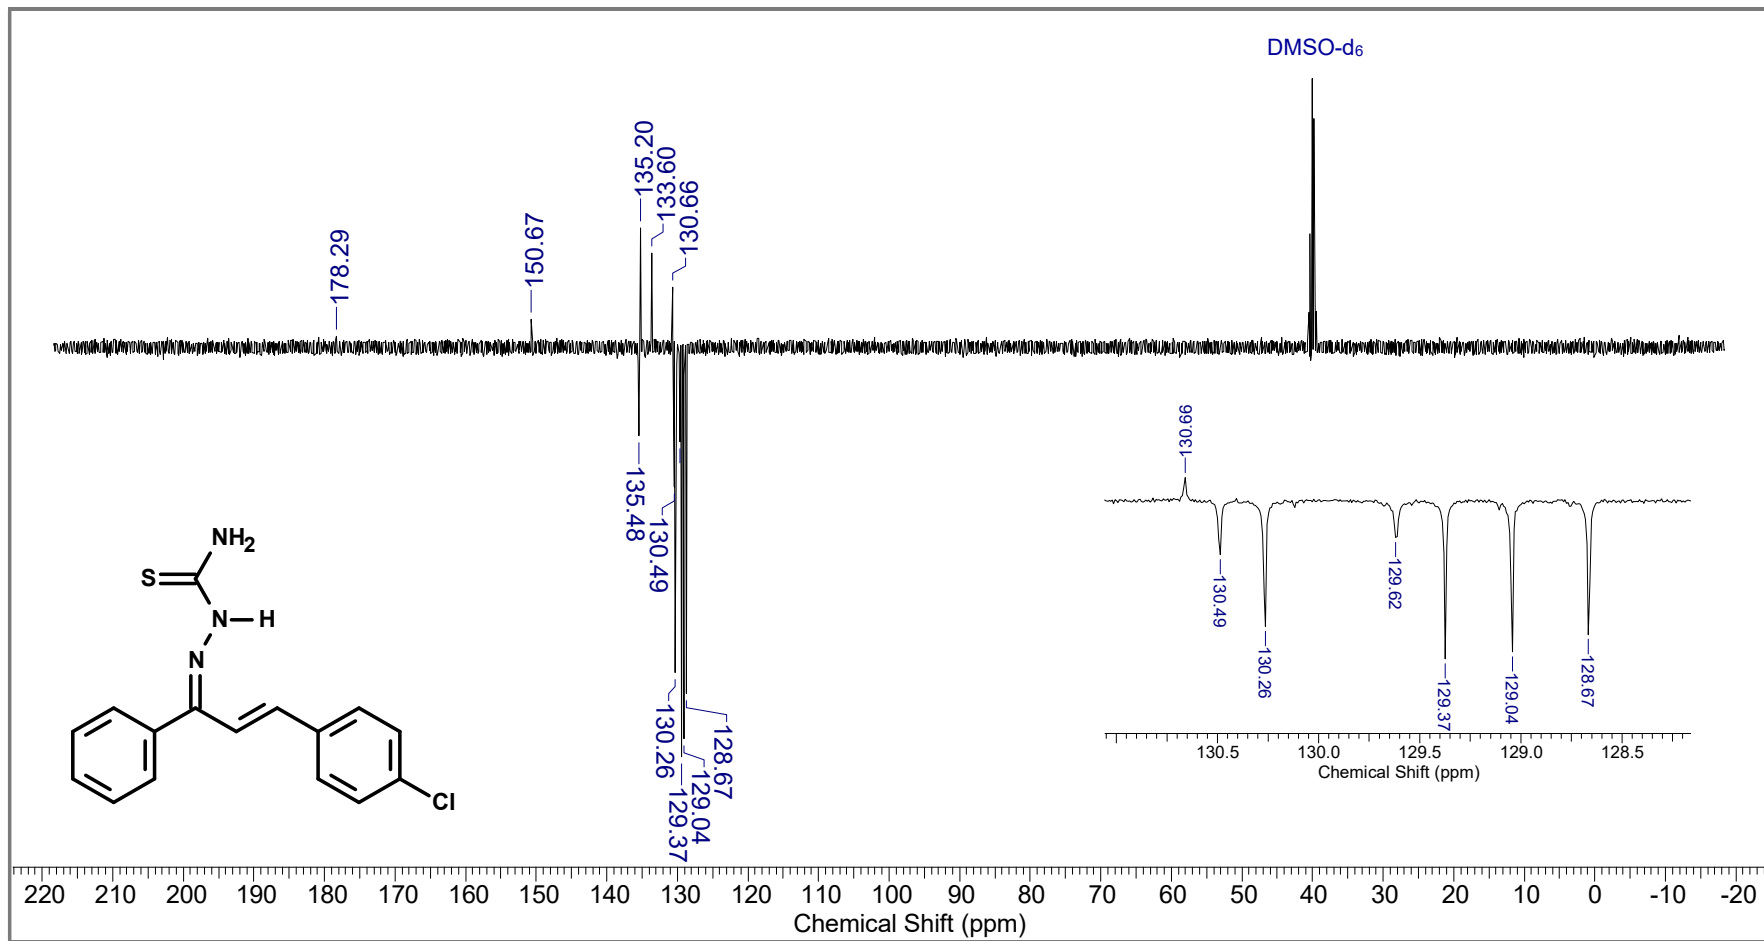

Figure S15. IR spectrum of 3-(4'-bromophenyl)-1-phenylprop-2-en-1-one thiosemicarbazone (5f)

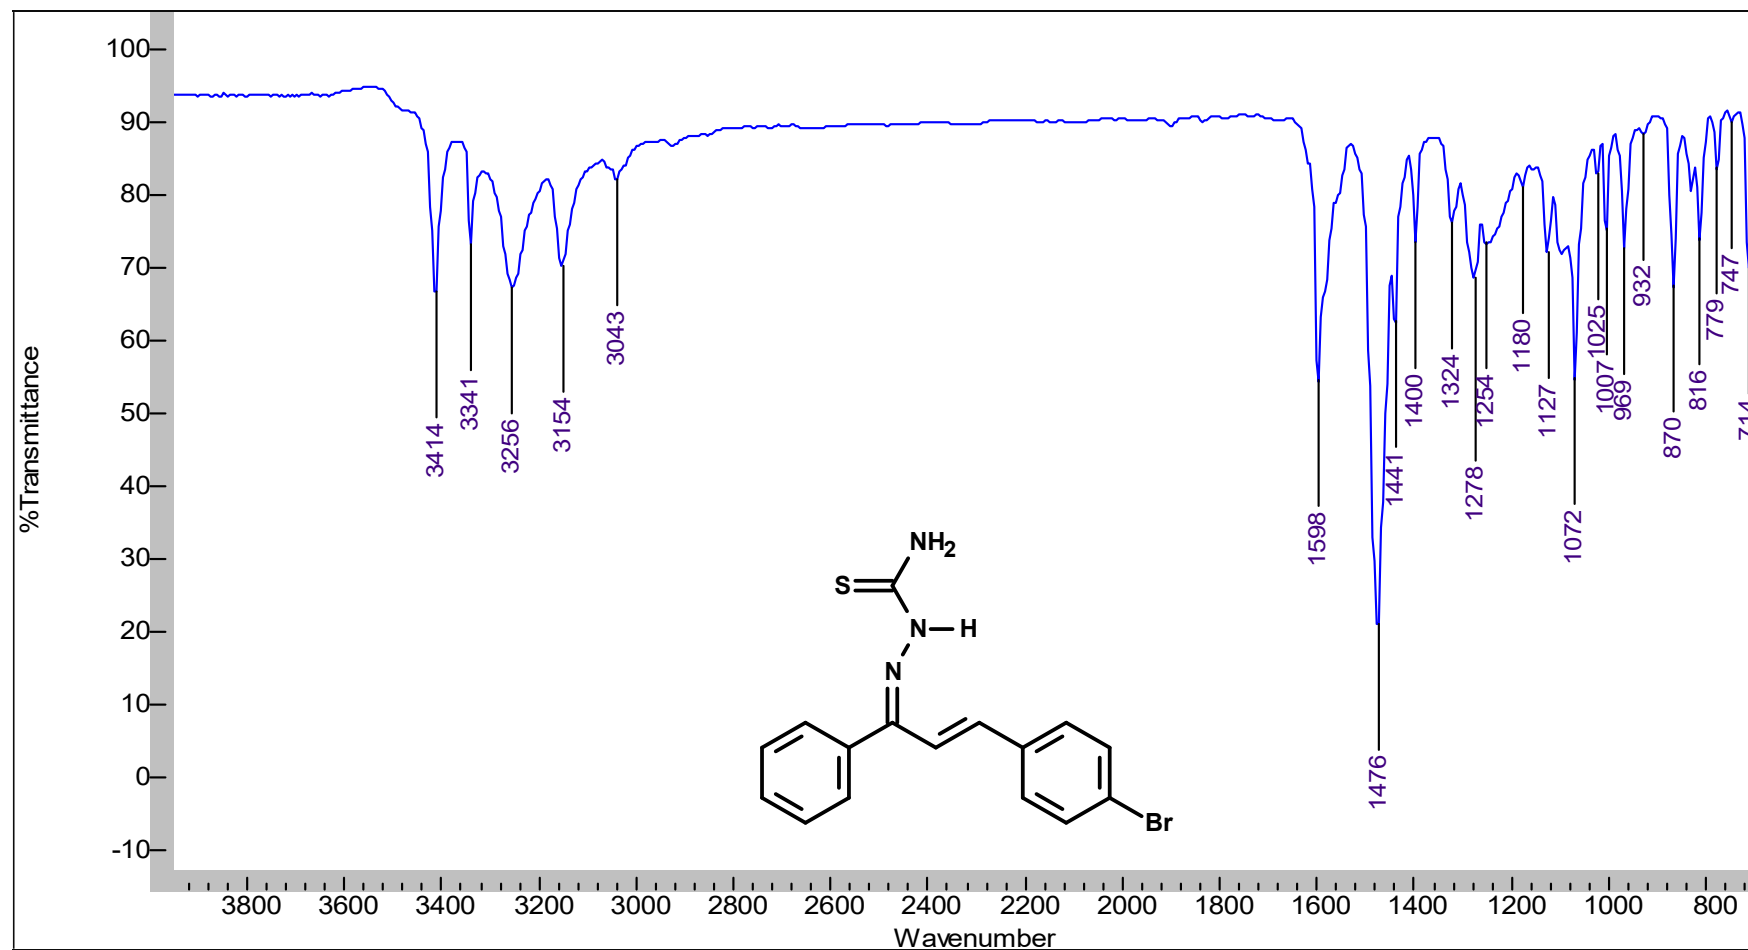



Figure S16. <sup>1</sup>H NMR spectrum of 3-(4'-bromophenyl)-1-phenylprop-2-en-1-one thiosemicarbazone (**5f**)

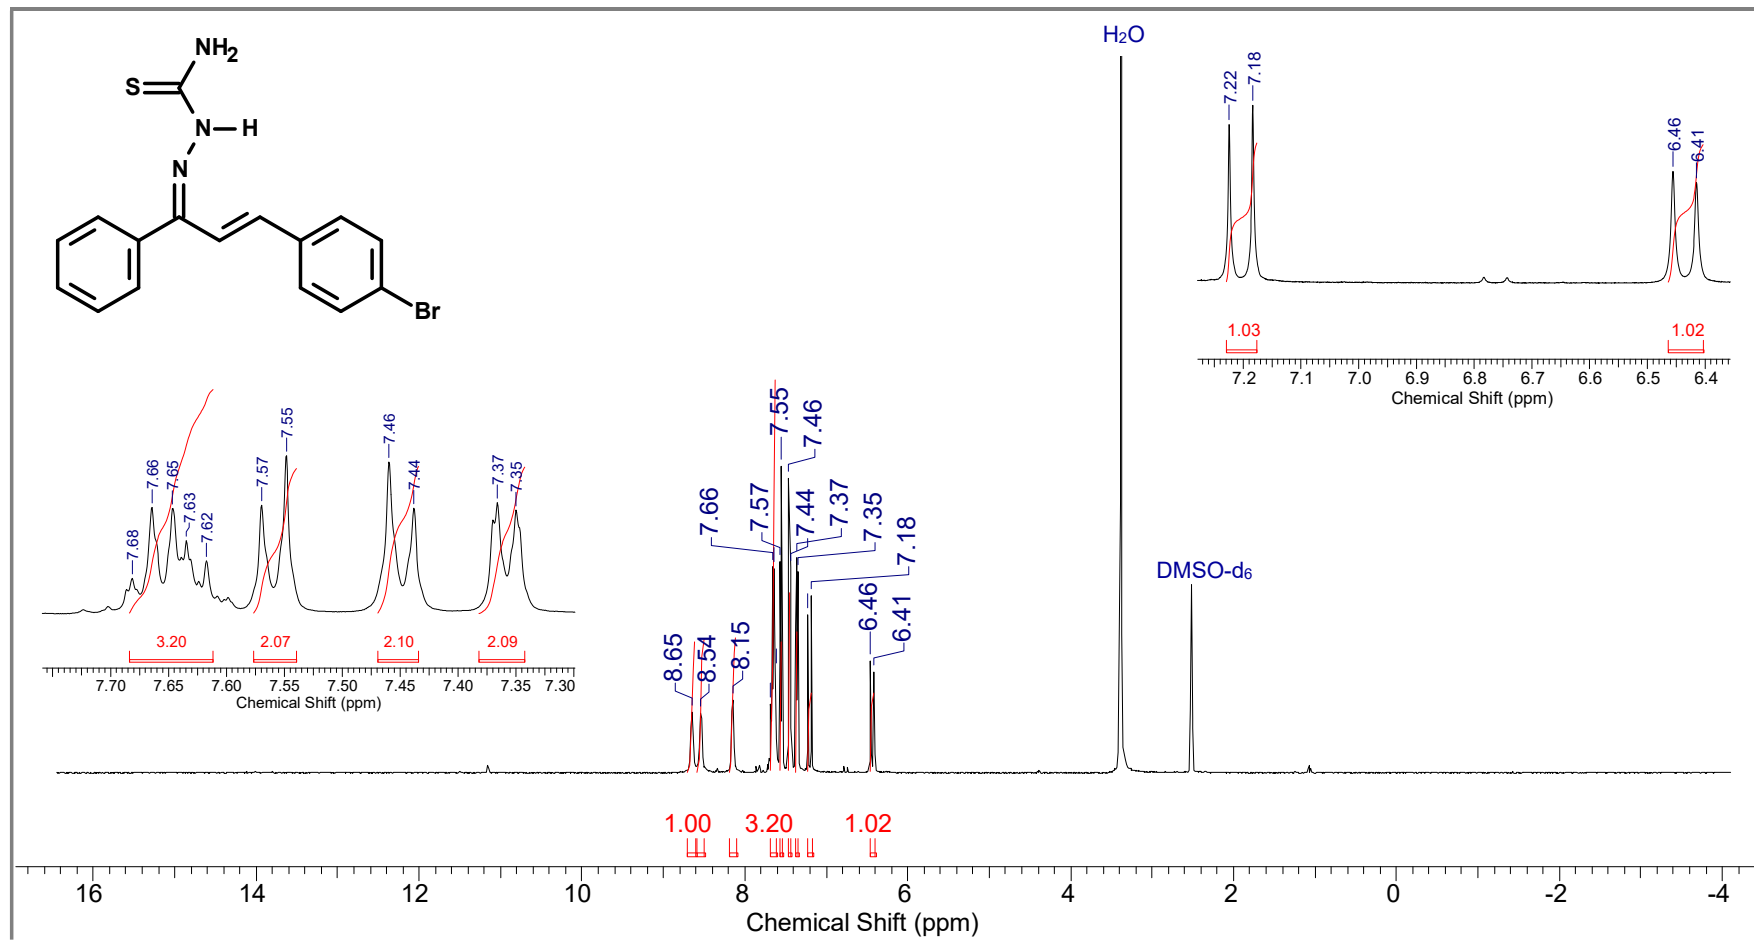

Figure S17.  $^{13}\text{C}$  NMR-DEPTQ spectrum of 3-(4'-bromophenyl)-1-phenylprop-2-en-1-one thiosemicarbazone (5f)

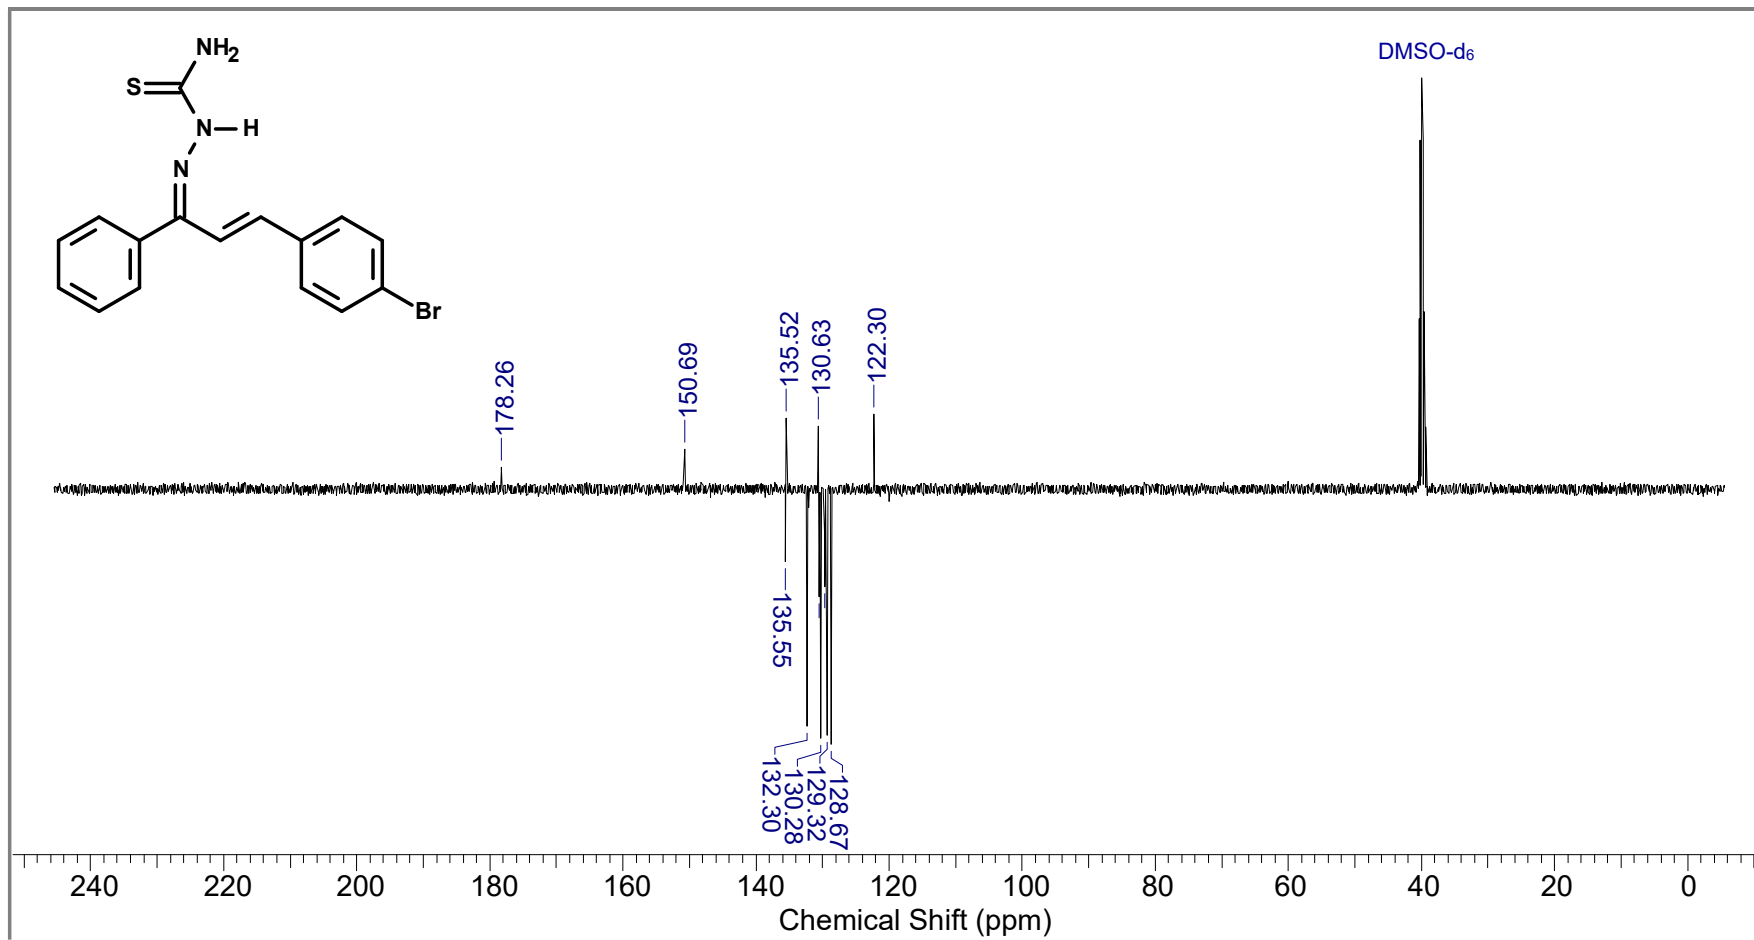

Figure S18. IR spectrum of 3-(4'-nitrophenyl)-1-phenylprop-2-en-1-one thiosemicarbazone (5g)

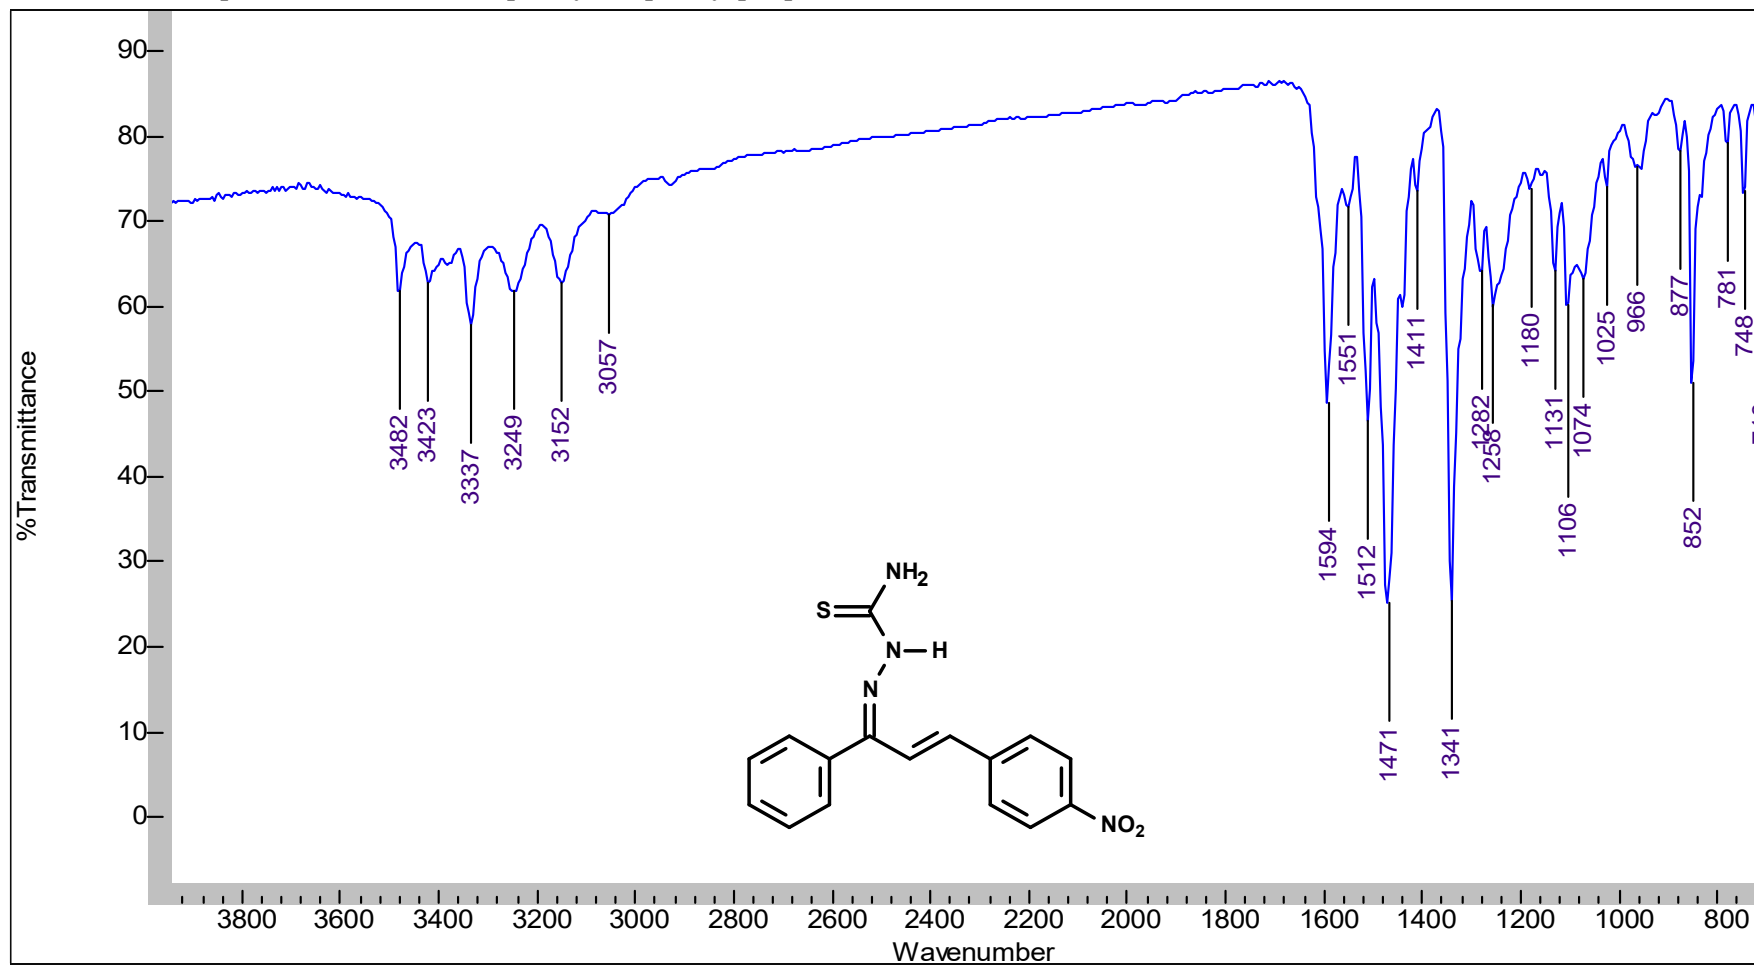

Figure S19.  $^{13}\text{C}$  NMR-DEPTQ spectrum of 3-(4'-nitrophenyl)-1-phenylprop-2-en-1-one thiosemicarbazone (**5g**)

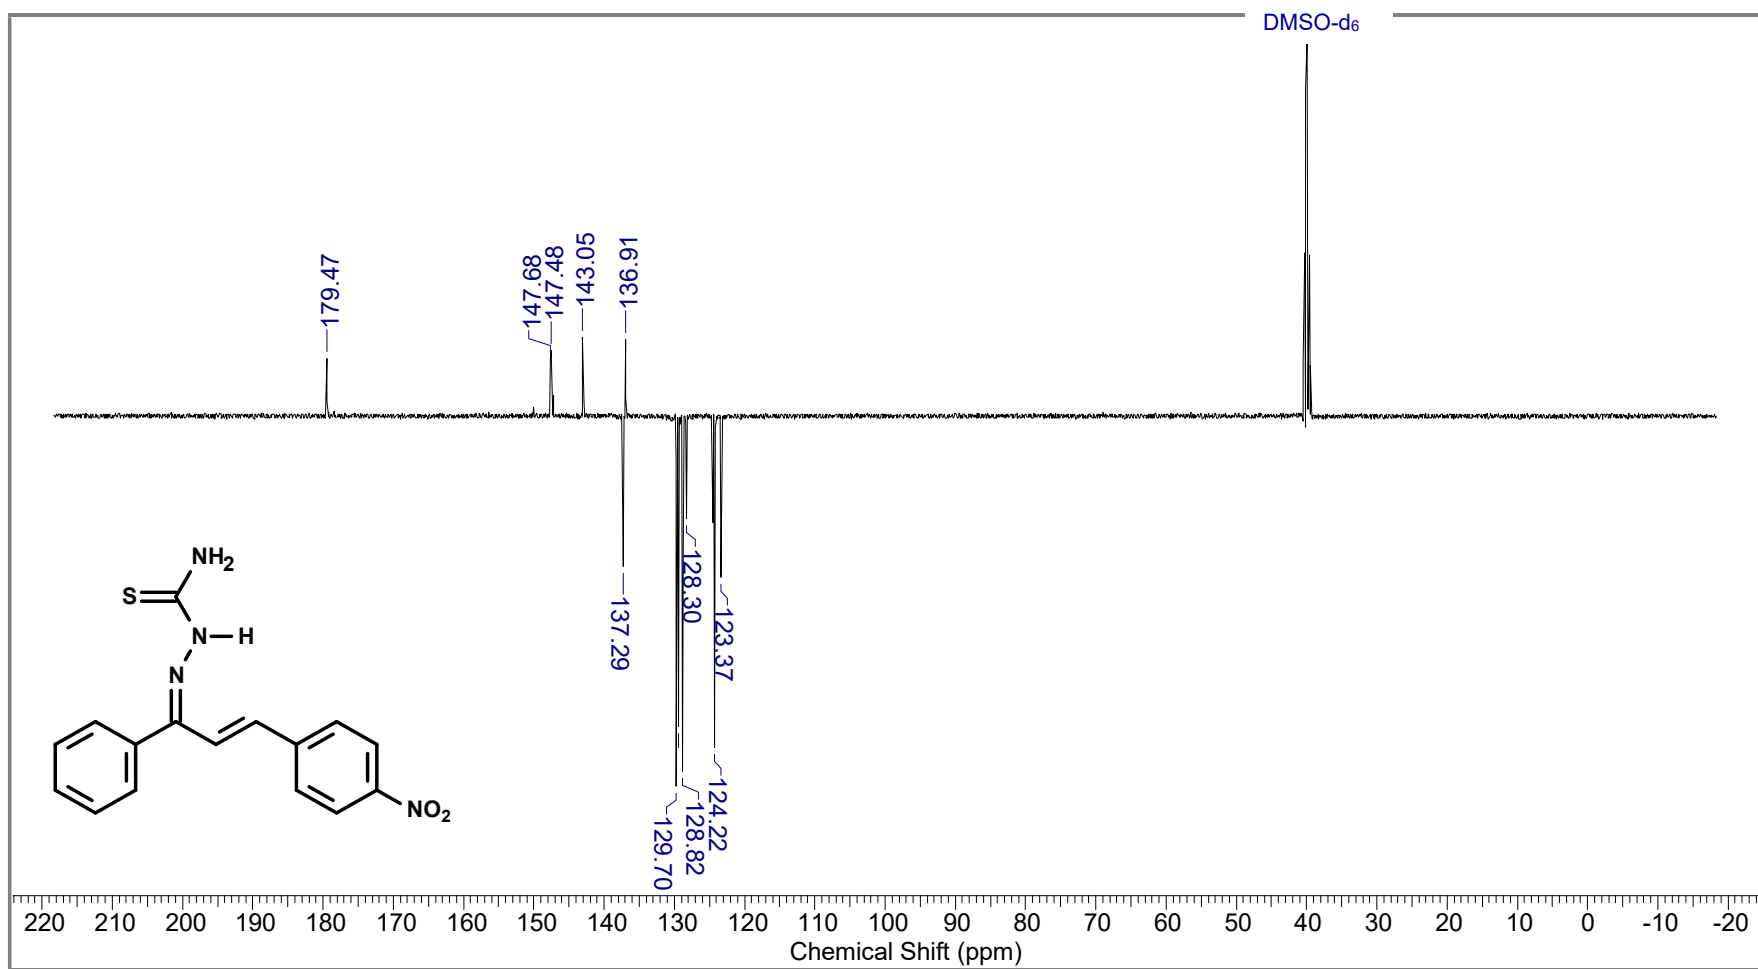

**Figure S20.** Double logarithmic plots for the interaction between HSA:5e at 289K, 296K, 303K, and 310K.

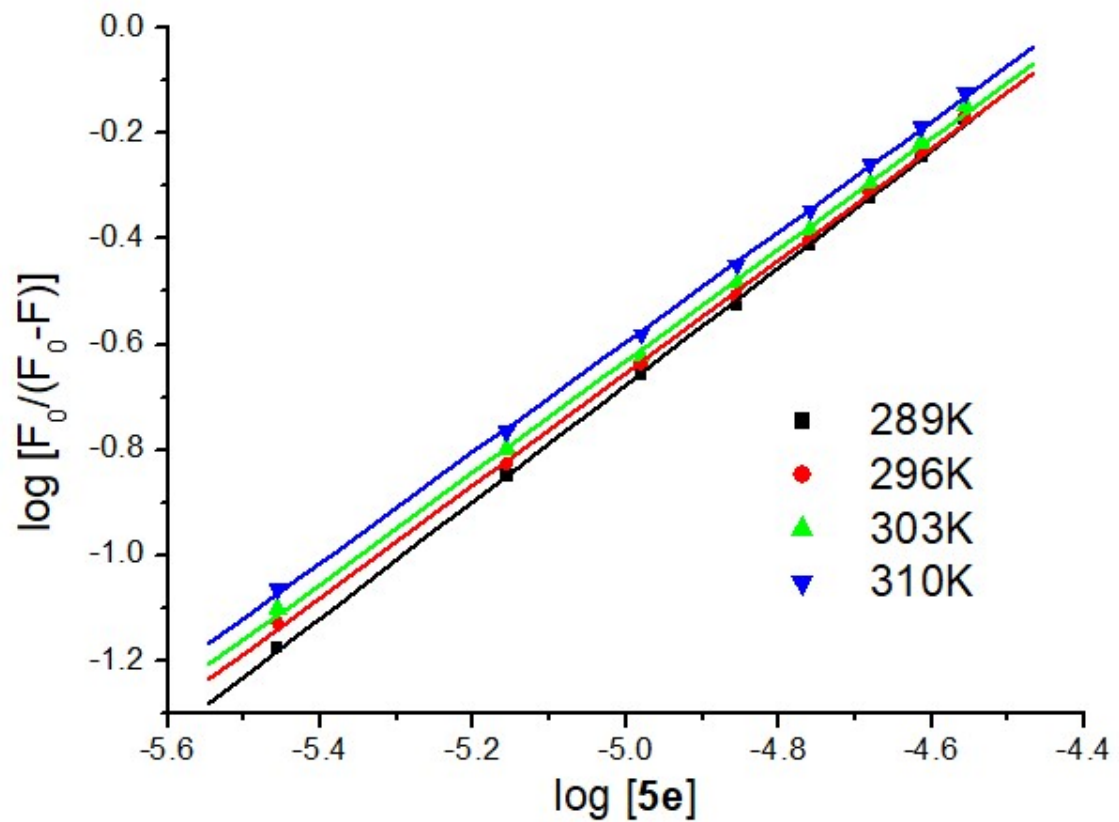

Figure S21. Van't Hoff plot for the interaction between HSA:5e at four different temperatures.

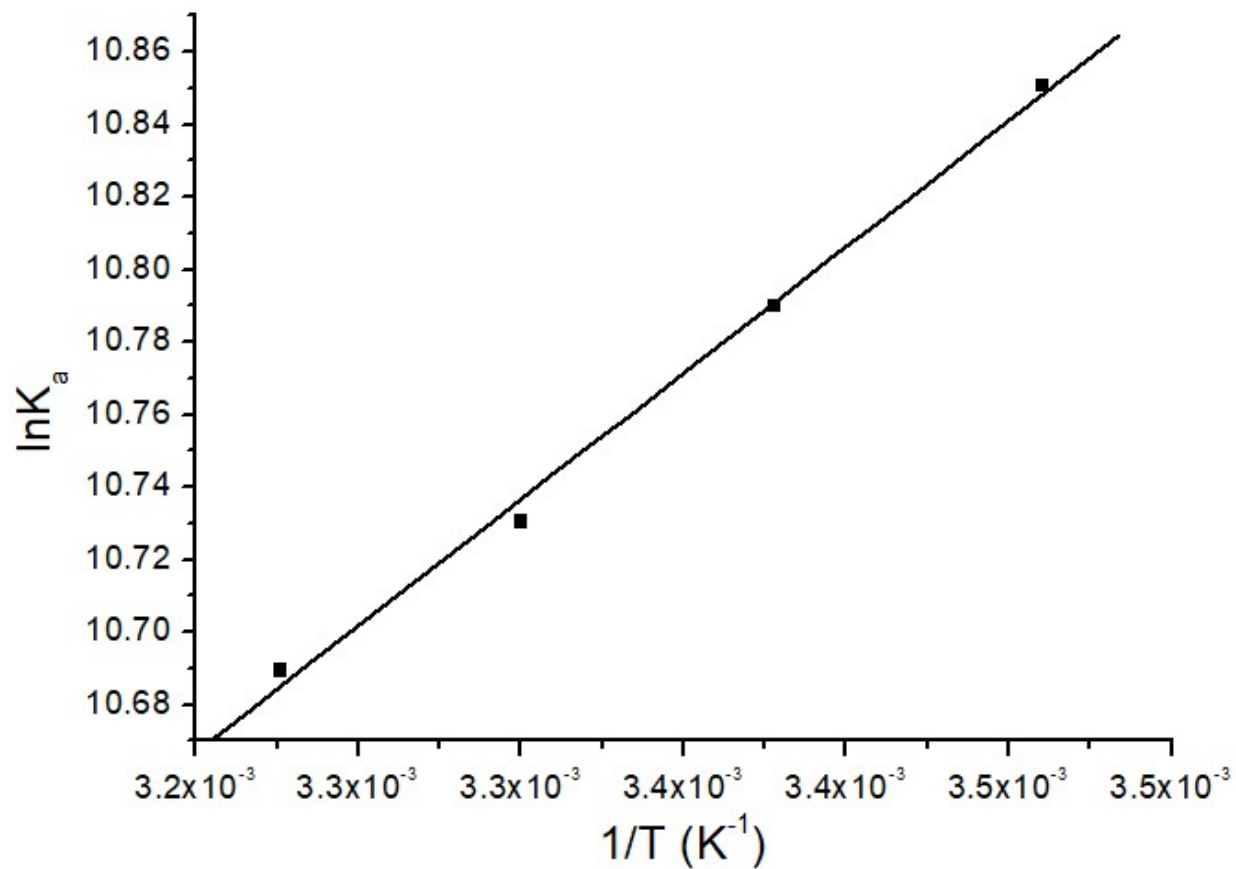

Supplement: s001 [file biomolecules-09-00643-s001.pdf]
